# Supplementary material for: Development of a Novel Biobased Polyurethane Resin System for Structural Composites
Source: MDPI journal article supplement (doi:10.3390/polym14214553), 2022-10-27
Supplement: s1 [file s1]

# Development of a Novel Biobased Polyurethane Resin System for Structural Composites

Oihane Echeverria-Altuna <sup>1</sup>, Olatz Ollo <sup>1</sup>, Izaskun Larraza <sup>2</sup>, Cristina Elizetxea <sup>1</sup>, Isabel Harismendy <sup>1,\*</sup> and Arantxa Eceiza <sup>2,\*</sup>

<sup>1</sup> TECNALIA, Basque Research and Technology Alliance, Science and Technology Park, Gipuzkoa Mikeletegi Pasealekua 2, 2009 Donostia-San Sebastian, Spain

<sup>2</sup> 'Materials + Technologies' Research Group (GMT), Department of Chemical and Environmental Engineering, Faculty of Engineering of Gipuzkoa, University of the Basque Country, Plaza Europa 1, 20018 Donostia-San Sebastian, Spain

\* Correspondence: isabel.harismendy@tecnalia.com (I.H.); arantxa.eceiza@ehu.eus (A.E.)

## Supplementary Materials

**Table S1.** Kinetic model parameters for the BIO-PUR systems.

|                       |                 | BIO-PUR2  | BIO-PUR3  |
|-----------------------|-----------------|-----------|-----------|
| <b>K<sub>1</sub></b>  | s <sup>-1</sup> | 2.59E+09  | 2.04E+09  |
| <b>E<sub>1</sub></b>  | °K              | 5.76E+04  | 1.01E+04  |
| <b>K<sub>2</sub></b>  | s <sup>-1</sup> | 7.32E+05  | 7.57E+04  |
| <b>E<sub>2</sub></b>  | °K              | 6.55E+03  | 5.56E+03  |
| <b>m</b>              |                 | 2.42E-01  | 4.96E-01  |
| <b>n</b>              |                 | 2.02E+00  | 2.39E+00  |
| <b>α<sub>c1</sub></b> |                 | -3.08E-01 | -9.71E-01 |
| <b>α<sub>c2</sub></b> |                 | 3.41E-03  | 5.00E-03  |
| <b>E<sub>d1</sub></b> |                 | -1.71E+02 | 7.28E+02  |
| <b>E<sub>d2</sub></b> |                 | 8.10E-01  | 2.77E+01  |

**Table S2.** Viscosity model parameters for the BIO-PUR systems.

|                      |      | BIO-PUR2 | BIO-PUR3 |
|----------------------|------|----------|----------|
| <b>η<sub>0</sub></b> | Pa s | 1.73E-07 | 2.93E-06 |
| <b>E</b>             | °K   | 7011     | 6300.2   |
| <b>p1</b>            |      | -2.2     | -4.4     |
| <b>p2</b>            |      | 10.8     | 10.0     |

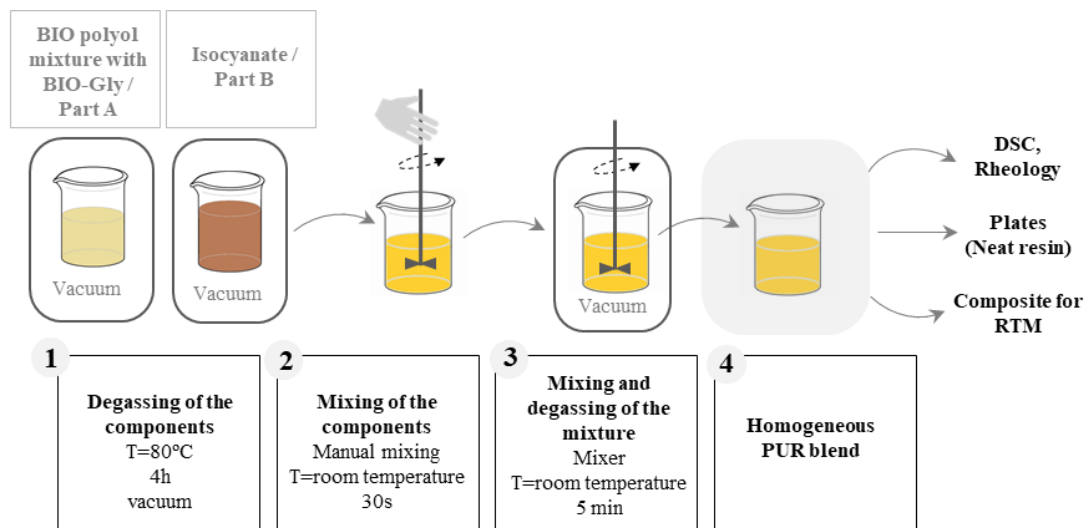

**Figure S1.** Polyurethane resin system preparation.

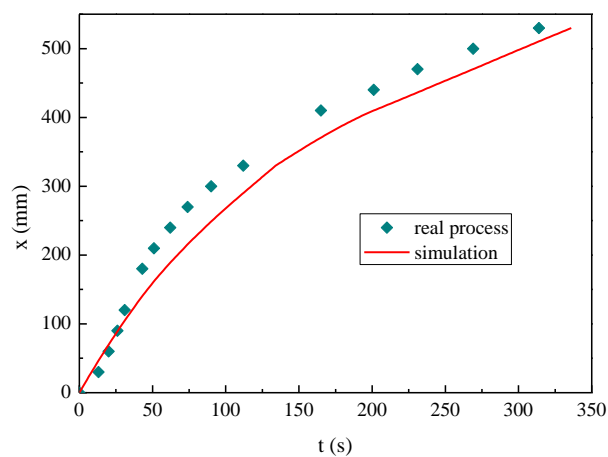

**Figure S2.** Flow front evolution for BIO-PUR3. Experimental (symbols) and simulation (—) results.
